# Supplementary material for: Human Immunodeficiency Virus-Type 1 LTR DNA contains an intrinsic gene producing antisense RNA and protein products
Source: PubMed Central journal article supplement (PMC1654176; doi:10.1186/1742-4690-3-80), 2006-11-08

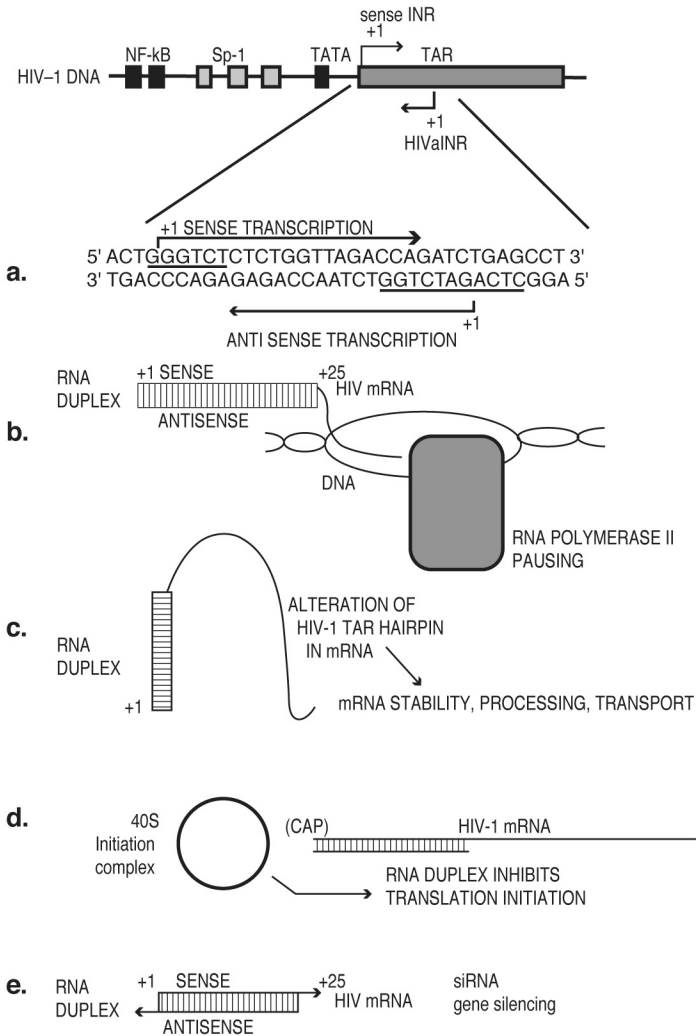

Supplement: 1742-4690-3-80-S3.pdf [file 1742-4690-3-80-S3.pdf]
