# Supplementary material for: Human Immunodeficiency Virus-Type 1 LTR DNA contains an intrinsic gene producing antisense RNA and protein products
Source: Retrovirology. 2006 Nov 8;3:80. doi: 10.1186/1742-4690-3-80 (PMC1654176; doi:10.1186/1742-4690-3-80)
Supplement: Additional File 2 — Figure 2S RT-PCR analysis of Jurkat T cells transiently transfected with a vector containing the HIV-1 LTR or controls. From U.S. patent 6,392,029, example 3. [file 1742-4690-3-80-S2.pdf]

|                   |     |                         |   |   |   |   |                       |   |   |   |   |   |    |   |       |    |     |                            |   |   |    |   |   |   |   |                       |  |  |  |  |  |  |  |  |  |  |  |  |  |  |  |  |
|-------------------|-----|-------------------------|---|---|---|---|-----------------------|---|---|---|---|---|----|---|-------|----|-----|----------------------------|---|---|----|---|---|---|---|-----------------------|--|--|--|--|--|--|--|--|--|--|--|--|--|--|--|--|
| Jurkat T cells    | -   | +                       | + | + | + | + | +                     | + | + | + | + | + | +  | M | +     | +  | -   | +                          | + | + | +  | + | + | + | + |                       |  |  |  |  |  |  |  |  |  |  |  |  |  |  |  |  |
| RNA source        | Sp6 |                         |   |   |   |   |                       |   |   |   |   |   | T7 |   |       |    | Sp6 |                            |   |   |    |   |   |   |   |                       |  |  |  |  |  |  |  |  |  |  |  |  |  |  |  |  |
| Transfection      | -   | +                       | + | + | - | - | +                     | + | + | + | + | + | +  |   | +     | +  |     | +                          | + | + | -  | - | - | + | + |                       |  |  |  |  |  |  |  |  |  |  |  |  |  |  |  |  |
| DNA               |     | NT                      |   |   |   |   | pSV-gal<br>pHIV-CAT → |   |   |   |   |   |    |   |       |    |     |                            |   |   | NT |   |   |   |   | pSV-gal<br>pHIV-CAT → |  |  |  |  |  |  |  |  |  |  |  |  |  |  |  |  |
| DNase             | +   | +                       | + | + | + | + | +                     | + | + | + | + | + | +  | + | +     | +  | +   | +                          | + | + | +  | + | + | + | + |                       |  |  |  |  |  |  |  |  |  |  |  |  |  |  |  |  |
| R.T. primer       |     | 5' Ava I —————→         |   |   |   |   |                       |   |   |   |   |   |    |   | 3'CAG |    |     | 5' Ava I —————→            |   |   |    |   |   |   |   |                       |  |  |  |  |  |  |  |  |  |  |  |  |  |  |  |  |
| PCR primers       |     | 5'Ava I / 3'441-b ————→ |   |   |   |   |                       |   |   |   |   |   |    |   | *     | ** |     | 5' Ava I / 3'Mae I-b ————→ |   |   |    |   |   |   |   |                       |  |  |  |  |  |  |  |  |  |  |  |  |  |  |  |  |
| Internal Standard | +   |                         |   |   |   |   |                       |   |   |   |   |   |    |   |       | +  | s-  | as-(-)                     |   |   |    |   |   |   |   |                       |  |  |  |  |  |  |  |  |  |  |  |  |  |  |  |  |
